# Supplementary material
Source: MDPI journal article supplement (https://www.mdpi.com/2073-4395/13/7/1925)

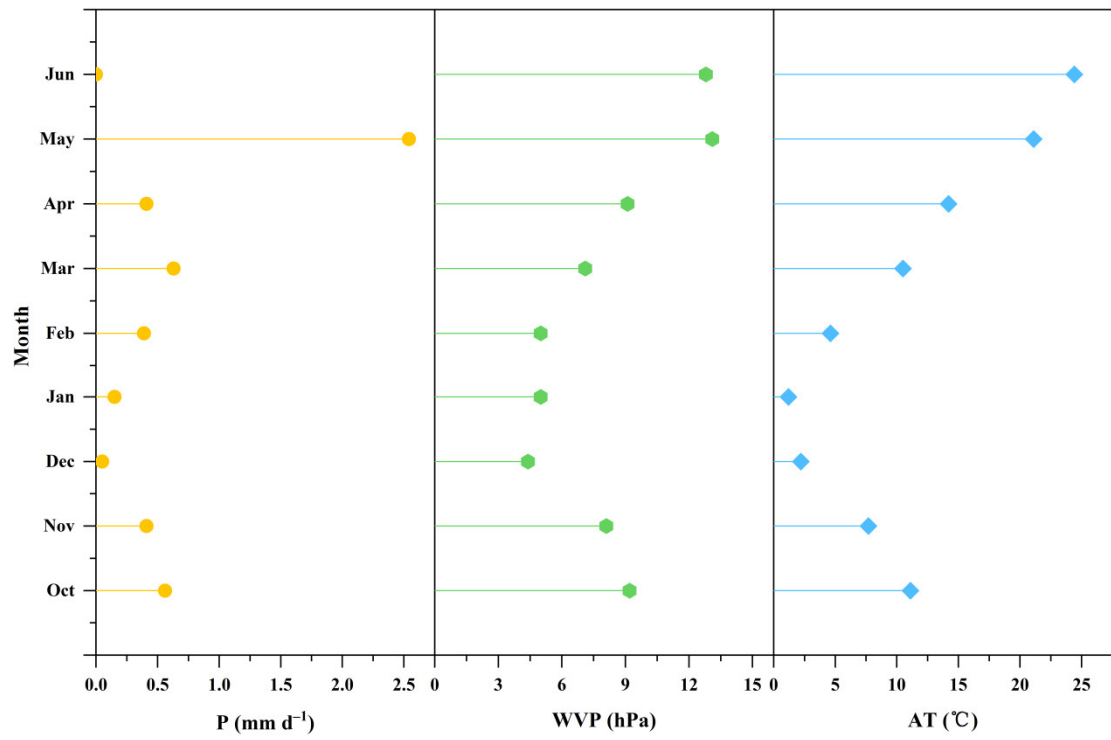

**Figure S1.** Meteorological data used for model validation during the 2019–2020 wheat growing season.

Supplement: s1 [file s1]
